# Supplementary material
Source: PubMed Central journal article supplement (PMC3707310)
Supplement: ma401014h_si_001.pdf [file ma401014h_si_001.pdf]

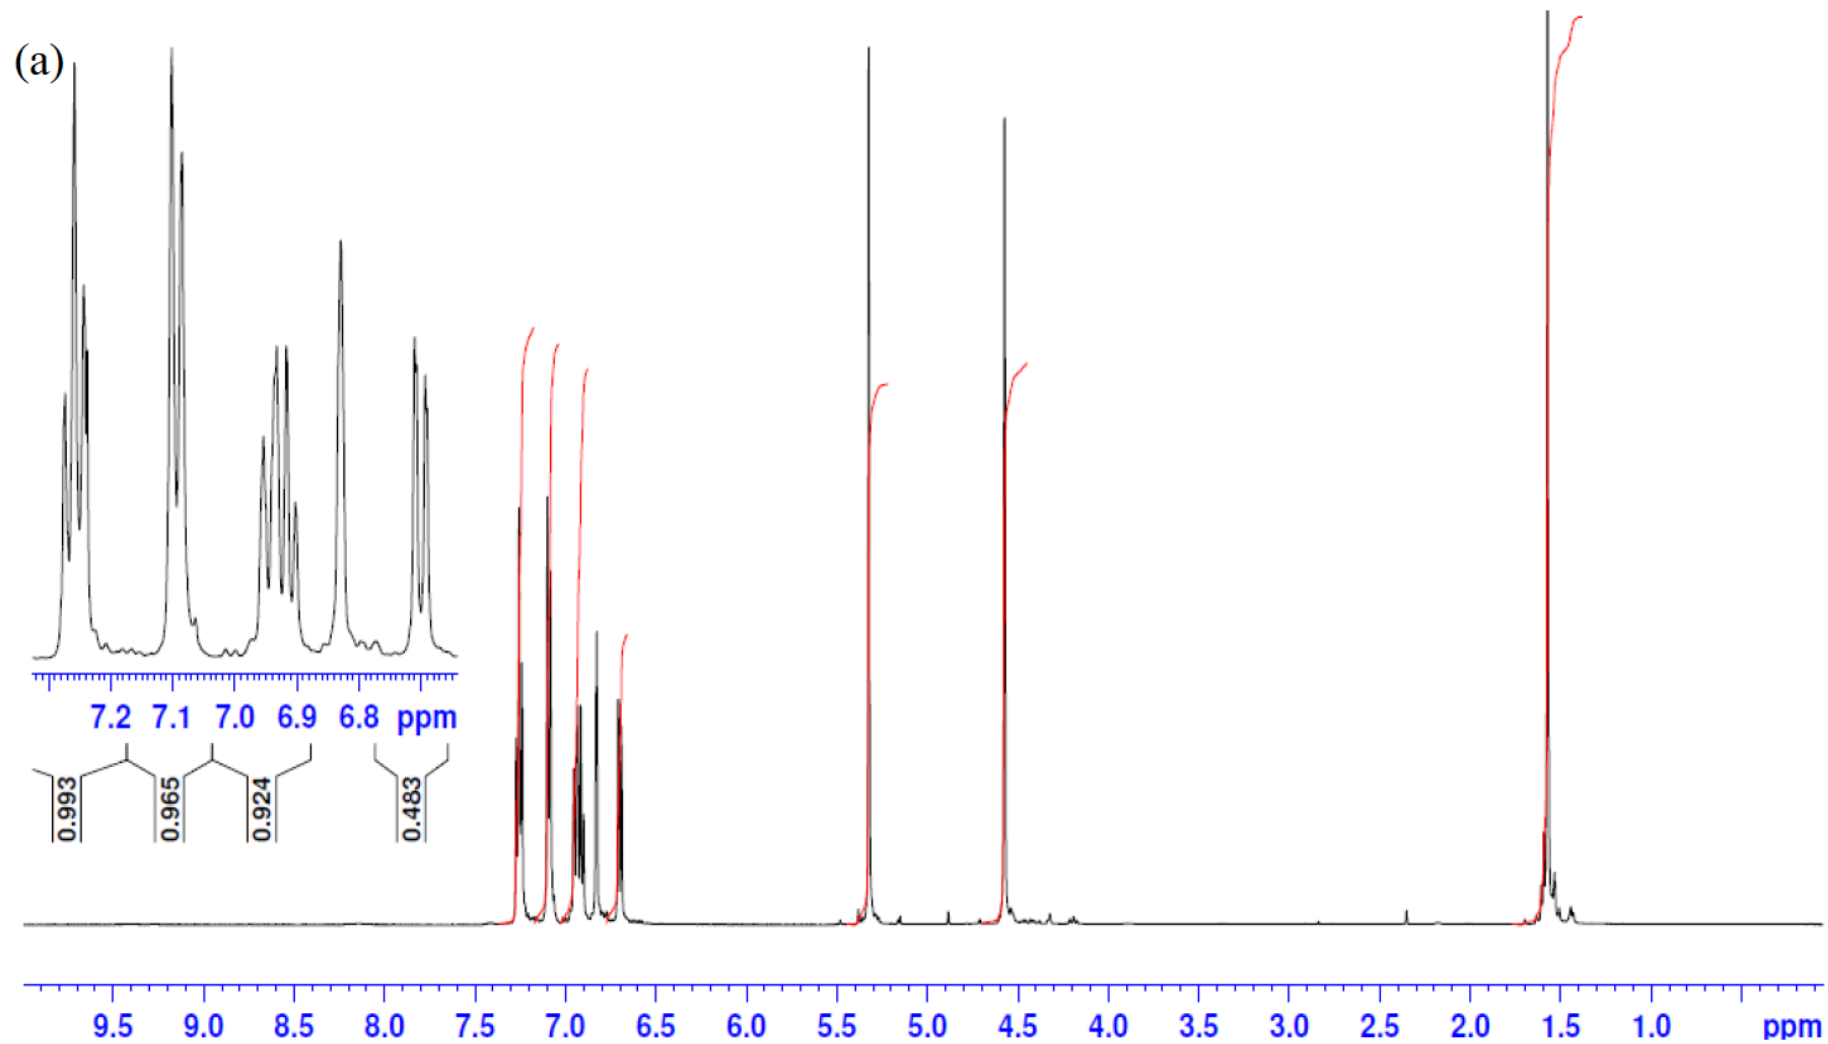

<sup>1</sup>H NMR Spectrum (500 MHz, CDCl<sub>3</sub>, 298 K) of BA-a (expansion showing aromatic region)

(b)

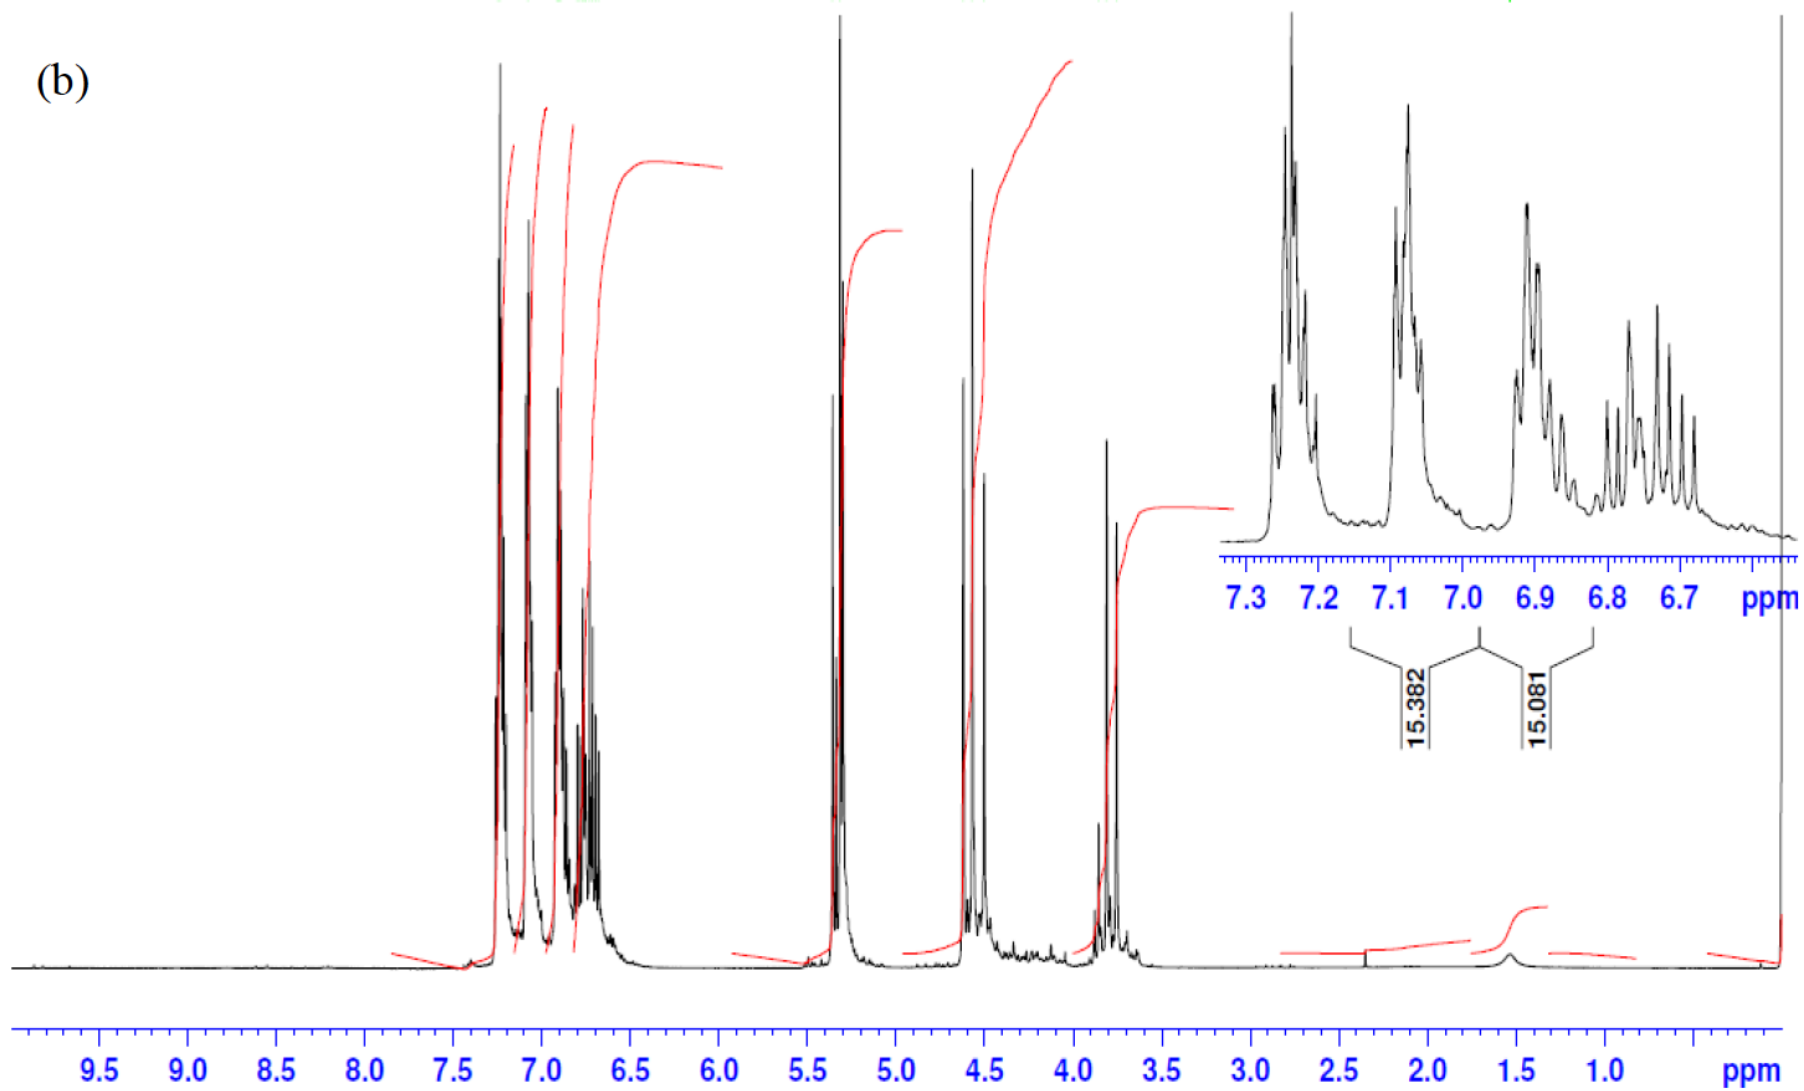

<sup>1</sup>H NMR Spectrum (500 MHz, CDCl<sub>3</sub>, 298 K) of BF-a (expansion showing aromatic region)

(c)

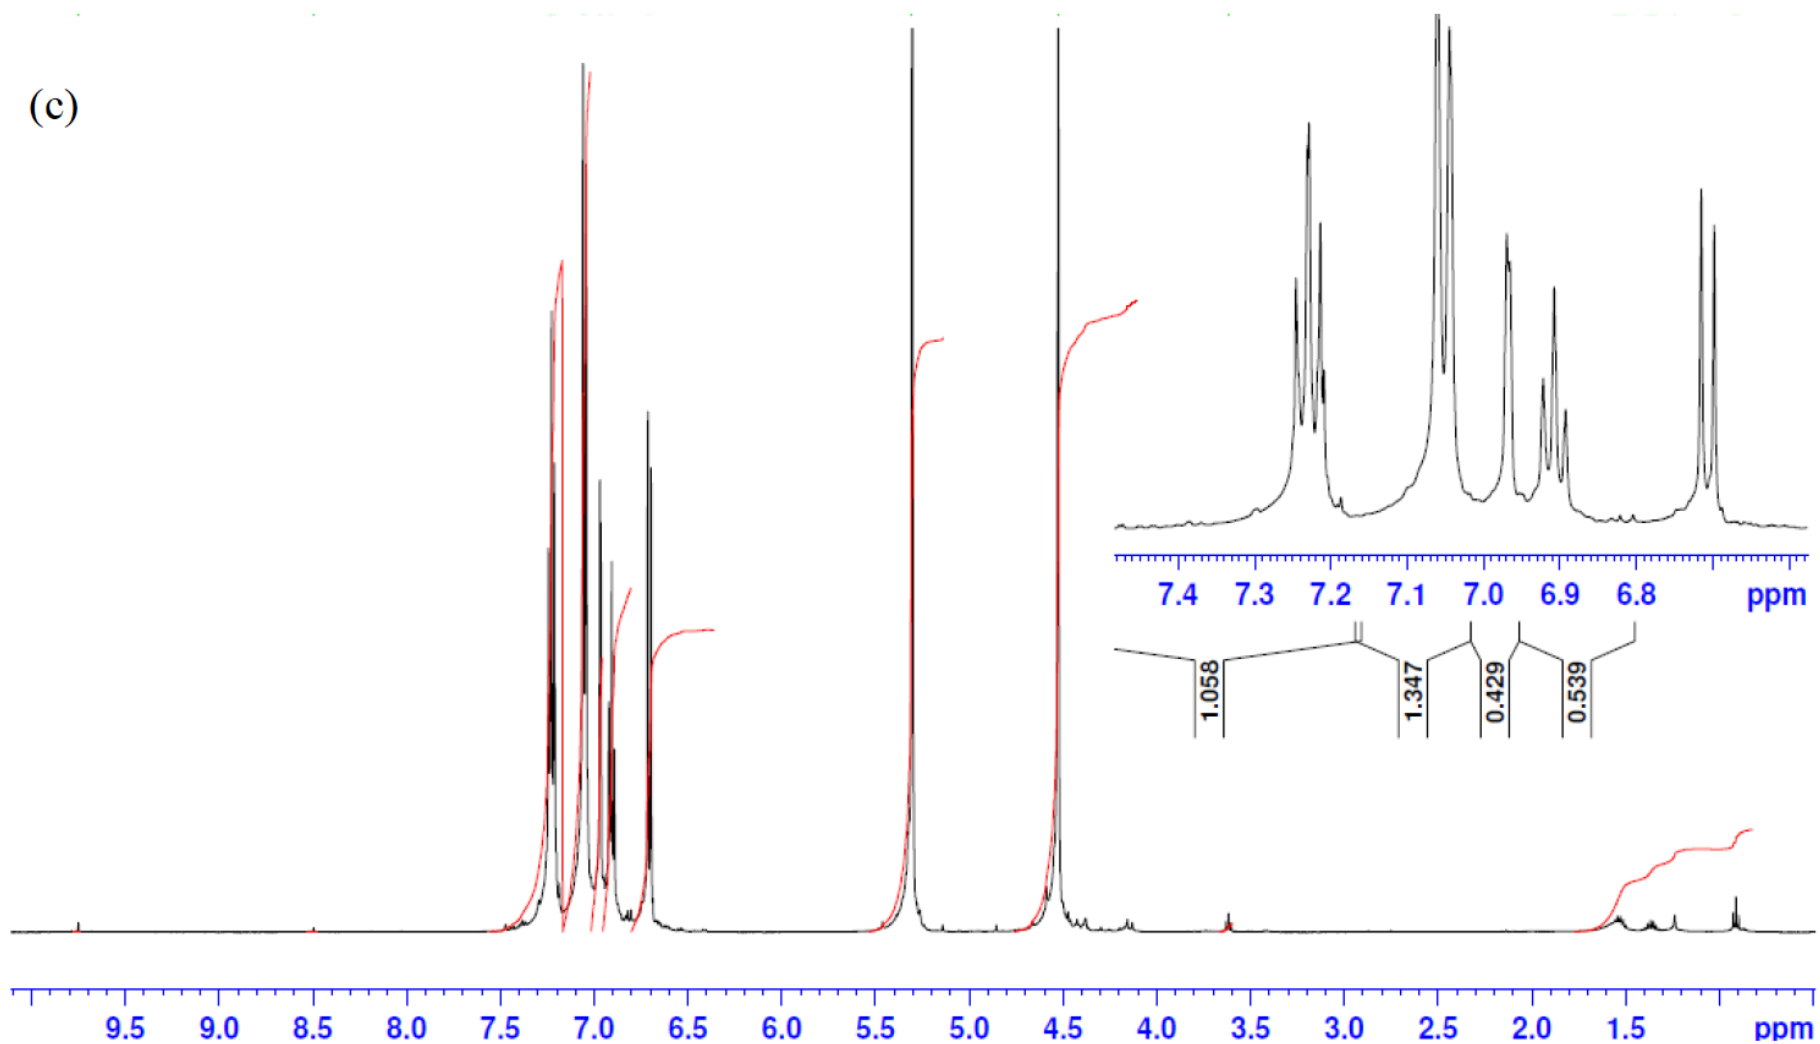

<sup>1</sup>H NMR Spectrum (500 MHz, CDCl<sub>3</sub>, 298 K) of BT-a (expansion showing aromatic region)

NMR spectral assignments for BA-a, BF-a and BT-a. Only peaks that could be assigned have been included, some not possible to assign due to interference from unknown contaminants.

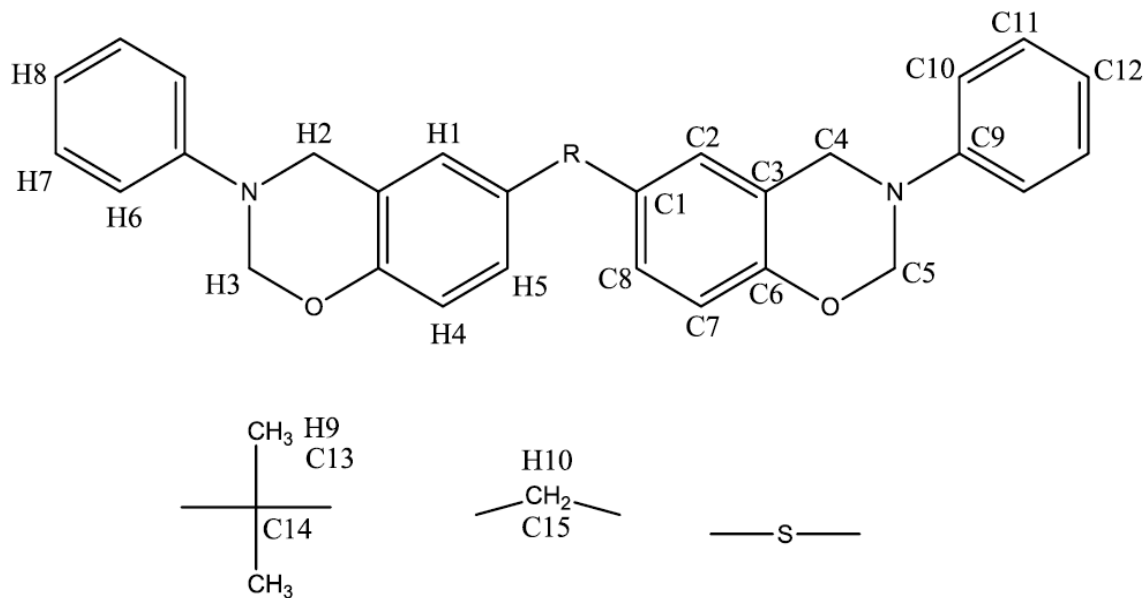

| <b>Proton</b> | <b>H1</b> | <b>H2</b> | <b>H3</b> | <b>H4</b> | <b>H5</b> | <b>H6</b> | <b>H7</b> | <b>H8</b> | <b>H9</b> | <b>H10</b> |            |            |            |            |            |
|---------------|-----------|-----------|-----------|-----------|-----------|-----------|-----------|-----------|-----------|------------|------------|------------|------------|------------|------------|
| <i>BA-a</i>   | 6.83 (s)  | 5.32 (s)  | 4.57 (s)  | 6.71 (d)  | 6.95 (d)  | 6.95 (d)  | 7.24 (t)  | 7.08 (t)  | 1.61 (s)  | -          |            |            |            |            |            |
| <i>BF-a</i>   | 6.8-6.93  | 5.33 (s)  | 4.57 (s)  | 6.68-6.79 | 6.8-6.93  | 6.8-6.93  | 7.20-7.22 | 7.06-7.10 | -         | 3.76 (s)   |            |            |            |            |            |
| <i>BT-a</i>   | 6.85      | 5.23 (s)  | 4.54 (s)  | 6.71 (d)  | 6.949     | 6.925 (d) | 7.22 (t)  | 7.07      | -         | -          |            |            |            |            |            |
| <b>Carbon</b> | <b>C1</b> | <b>C2</b> | <b>C3</b> | <b>C4</b> | <b>C5</b> | <b>C6</b> | <b>C7</b> | <b>C8</b> | <b>C9</b> | <b>C10</b> | <b>C11</b> | <b>C12</b> | <b>C13</b> | <b>C14</b> | <b>C15</b> |
| <i>BA-a</i>   | 143.24    | 126.40    | 124.77    | 79.13     | 50.70     | 152.21    | 116.39    | 121.21    | 148.52    | 120.09     | 129.27     | 118.03     | 41.80      | 31.08      | -          |
| <i>BF-a</i>   | 135.17?   | 125.06    | 124.78    | 79.50     | 51.00     | 152.25    | 116.85    | 121.50    | 148.49    | 120.66     | 129.49     | 118.50     | -          | -          | 34.74      |
| <i>BT-a</i>   | 131.21?   |           | 127.37    | 79.59     | 50.04     | 153.87    | 117.92    | 121.70    | 148.21    |            | 129.74     | 118.34     | -          | -          | -          |
